# Supplementary material for: Computational modelling of the regulation of Insulin signalling by oxidative stress
Source: Springer Nature journal article supplement (doi:10.1186/1752-0509-7-41), 2013-01-01

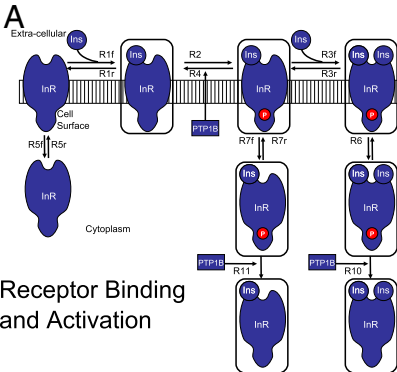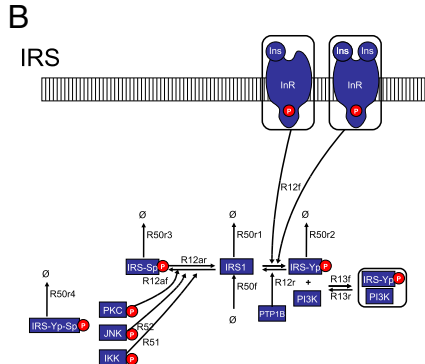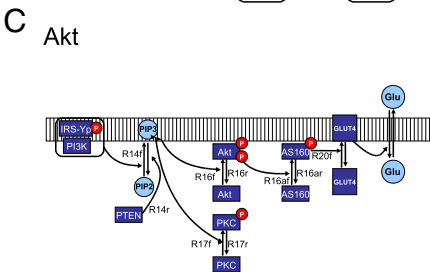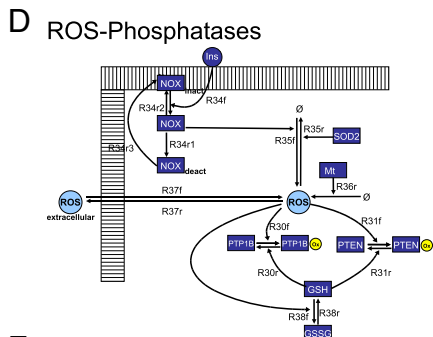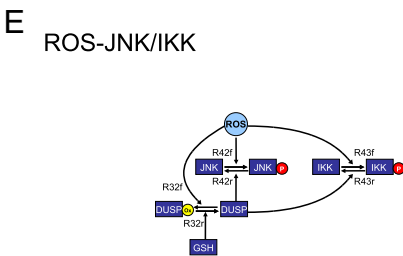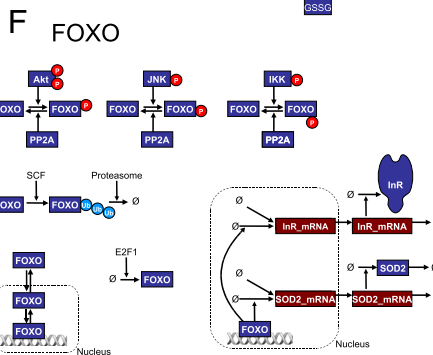

Supplement: 12918_2012_1092_MOESM13_ESM.pdf [file 12918_2012_1092_MOESM13_ESM.pdf]
